# Supplementary material for: A Retrospective Review of Resuscitation Planning at a Children&rsquo;s Hospital
Source: Preprints.org preprint supplement (doi:10.20944/preprints201712.0004.v1), 2017-12-01
Supplement: Supplementary file 2 [file supplementary:Resuscitation%20Audit%20Tool.pdf]

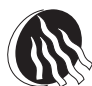

Queensland  
Government

Children's Health Queensland

## PARP Audit

(Affix patient identification label here)

URN:

Family Name:

Given Names:

Address:

Date of Birth:

Sex: ☐ M ☐ F ☐ I

### I Patient Demographics

Diagnosis:

Cause of death:

Date of death:        /        /

Location of deceased:

### II Parental Demographics

#### Marital status

☐ Married or in a stable relationship ☐ Separated / divorced ☐ Single parent ☐ Foster care

#### Education level

☐ Tertiary ☐ Trade or Certificate ☐ Completed school ☐ Not known

#### Background

Ethnicity: ☐ Caucasian ☐ ATSI ☐ Other CAL

### III Referral to Palliative Care

Referral to Palliative Care Service: ☐ Yes ☐ No

Referral source to Palliative Care: ☐ Tertiary Care Team ☐ Primary Care Team ☐ Other

### IV Resuscitation Plan

Did patient have a resuscitation plan? ☐ Yes ☐ No      Date resuscitation plan was made:        /        /

### V If Patient Died in Hospital

#### Final ward

☐ Medical ☐ Surgical ☐ HDU/ICU

#### Transferred from

☐ Regional / rural hospital ☐ Regional / rural home location ☐ Tertiary hospital ☐ Urban home location

#### Duration of admission

☐ <24 hrs ☐ 24 - 48 hrs ☐ Up to 1 week ☐ Up to 1 month  
☐ Up to 3 months ☐ 3 months - 1 year ☐ >1 year

#### During final admission was there a:

MERT ☐ Yes ☐ No

Resuscitation attempt ☐ Yes ☐ No

Transfer to ICU/HDU ☐ Yes ☐ No

#### Death within:

☐ 24 Hours ☐ 1 Week  
☐ 48 - 72 Hours ☐ >1 Week



Queensland  
Government

Children's Health Queensland

## PARP Audit

(Affix patient identification label here)

URN:

Family Name:

Given Names:

Address:

Date of Birth:

Sex: ☐ M ☐ F ☐ I

### VI Resuscitation Planning

| Documentation                                     | Provide | Don't provide | Not mentioned |
|---------------------------------------------------|---------|---------------|---------------|
| MERT Call                                         |         |               |               |
| CPR                                               |         |               |               |
| Defibrillation                                    |         |               |               |
| Date of death                                     |         |               |               |
| Ventilation: <input type="checkbox"/> Intubation  |         |               |               |
| <input type="checkbox"/> Non-invasive ventilation |         |               |               |
| ICU Admission (or HDU)                            |         |               |               |
| Comfort measures / palliative support             |         |               |               |
| Blood Products                                    |         |               |               |
| IV fluids                                         |         |               |               |
| Antibiotics                                       |         |               |               |
| Medication Review                                 |         |               |               |
| Cardiac drugs                                     |         |               |               |
| Nutrition                                         |         |               |               |

Is there documentation to provide other active life sustaining measures? ☐ Yes ☐ No

Is there documentation to withhold or withdraw other life sustaining measures? ☐ Yes ☐ No

Has any treatment been provided that has been requested to be not provided? ☐ Yes ☐ No

Patient choices documented ☐ Yes ☐ No

Ability to consent / Gillick competence ☐ Yes ☐ No

Decision maker documented ☐ Yes ☐ No

Involvement of Child Safety ☐ Yes ☐ No

### VII Documentation

**If Resuscitation Plan is documented, where in the chart was it documented?**

Front of Chart ☐ Yes

Current admission ☐ Yes

Correspondence ☐ Yes

Other admission ☐ Yes

Was Resuscitation Plan easily identified? ☐ Yes ☐ No

Clinical assessment documented? ☐ Yes ☐ No

**Days from Resuscitation Plan documented to death:** .....
